# Supplementary material for: Simultaneous Quantification of Aspirin, Its Metabolite Salicylic Acid, and Salvianolic Acid B in Human Plasma Using UPLC-MS/MS
Source: Hindawi journal article supplement (doi:10.1155/2021/6620868), 2021-03-29
Supplement: f1 [file 6620868.f1.pdf]

Day1 Curve

Sal B

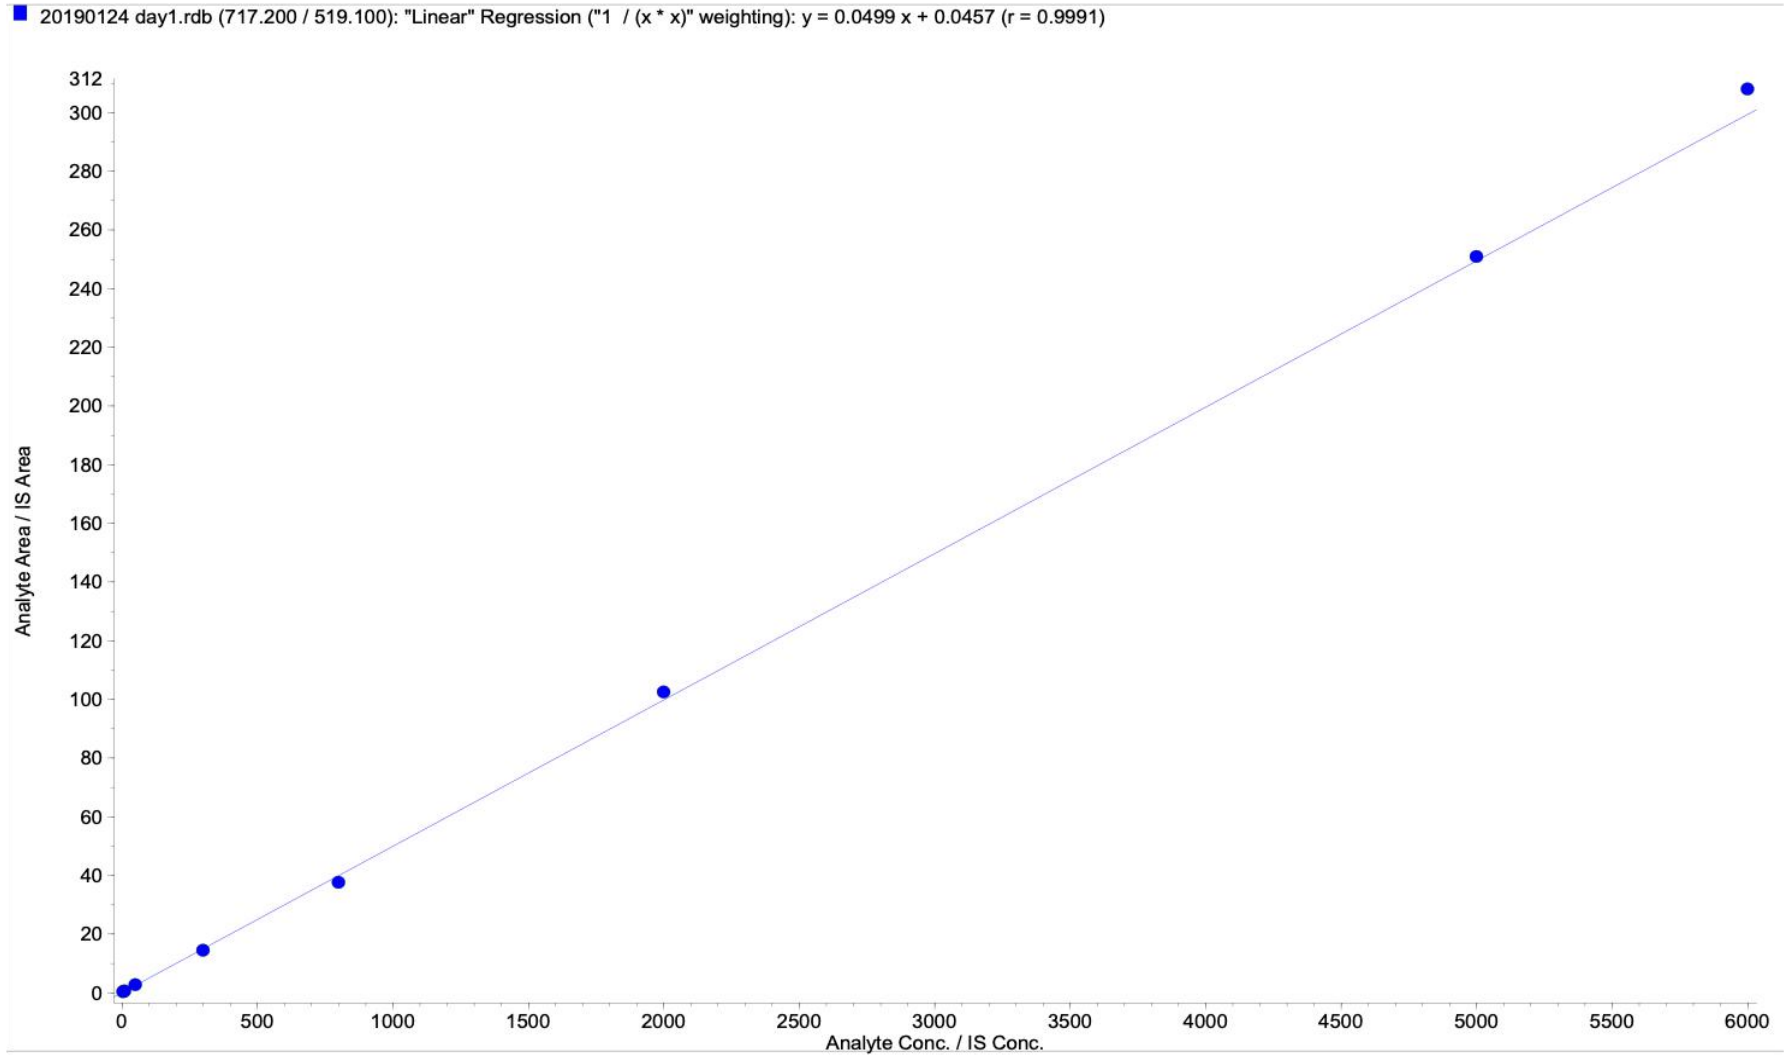

ASA

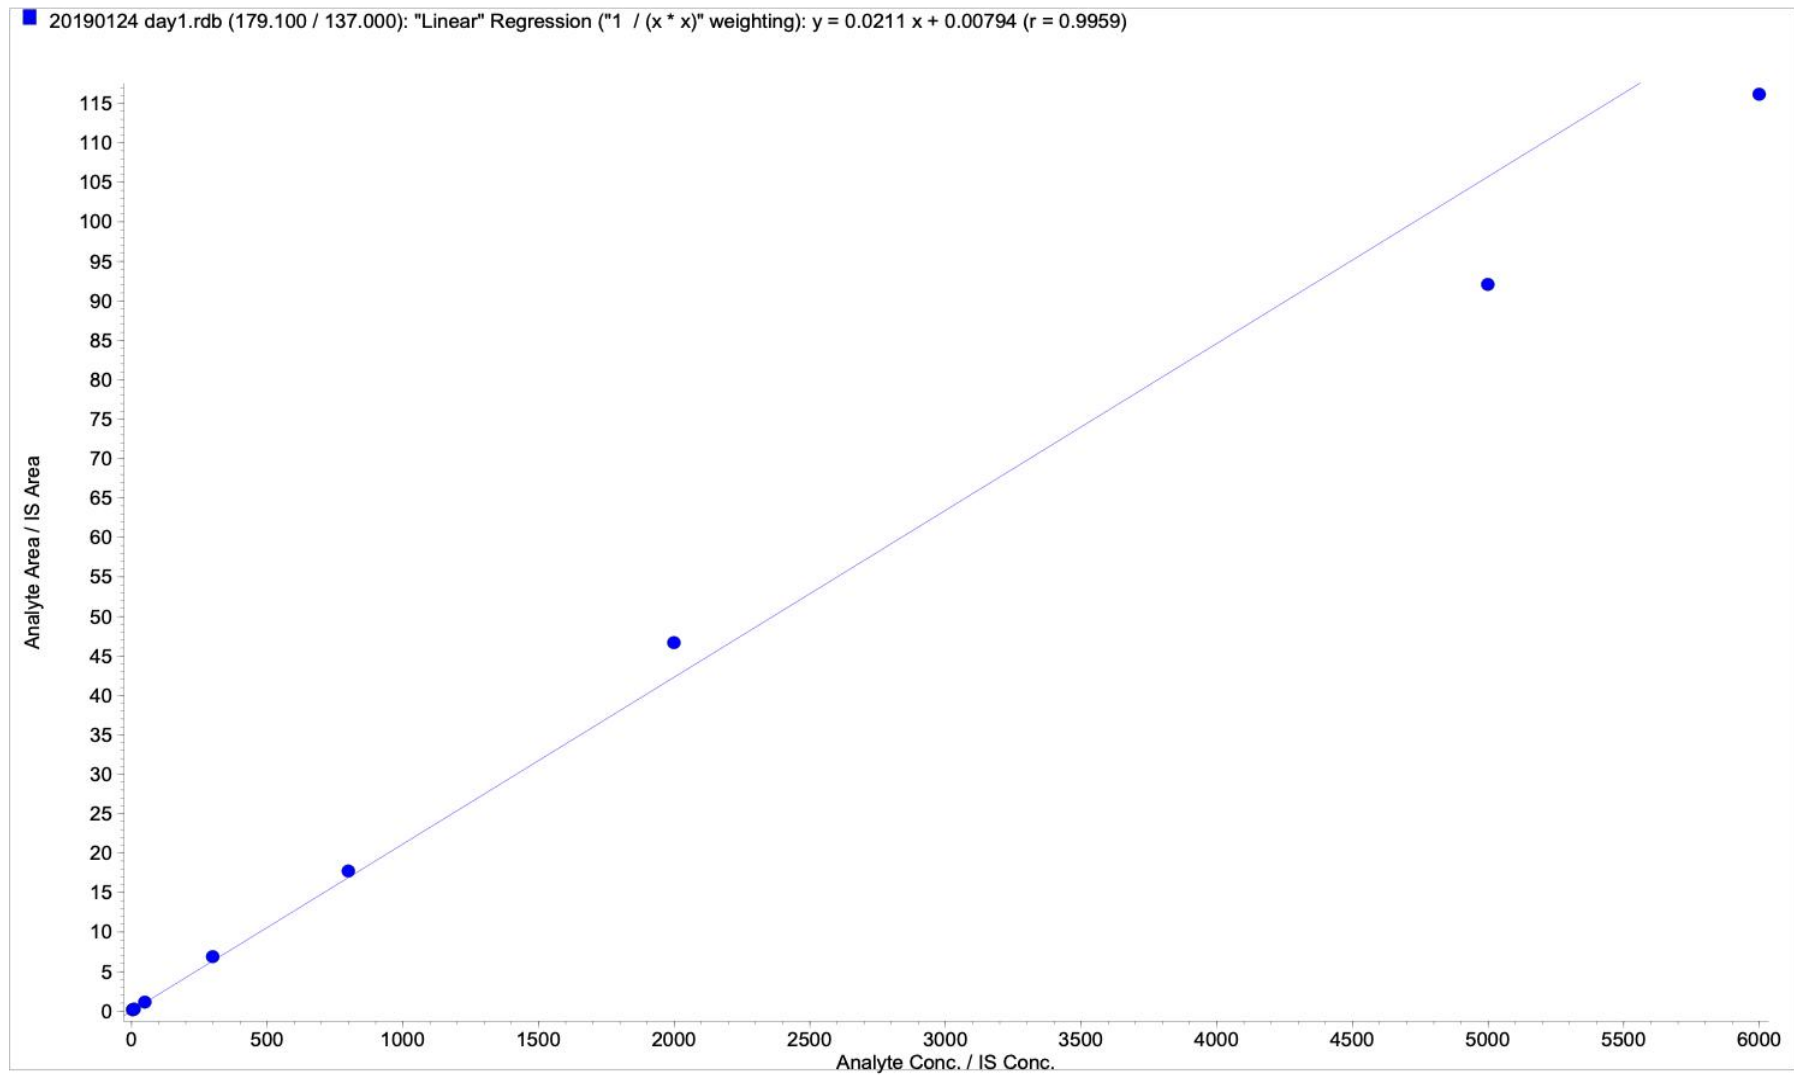

SA

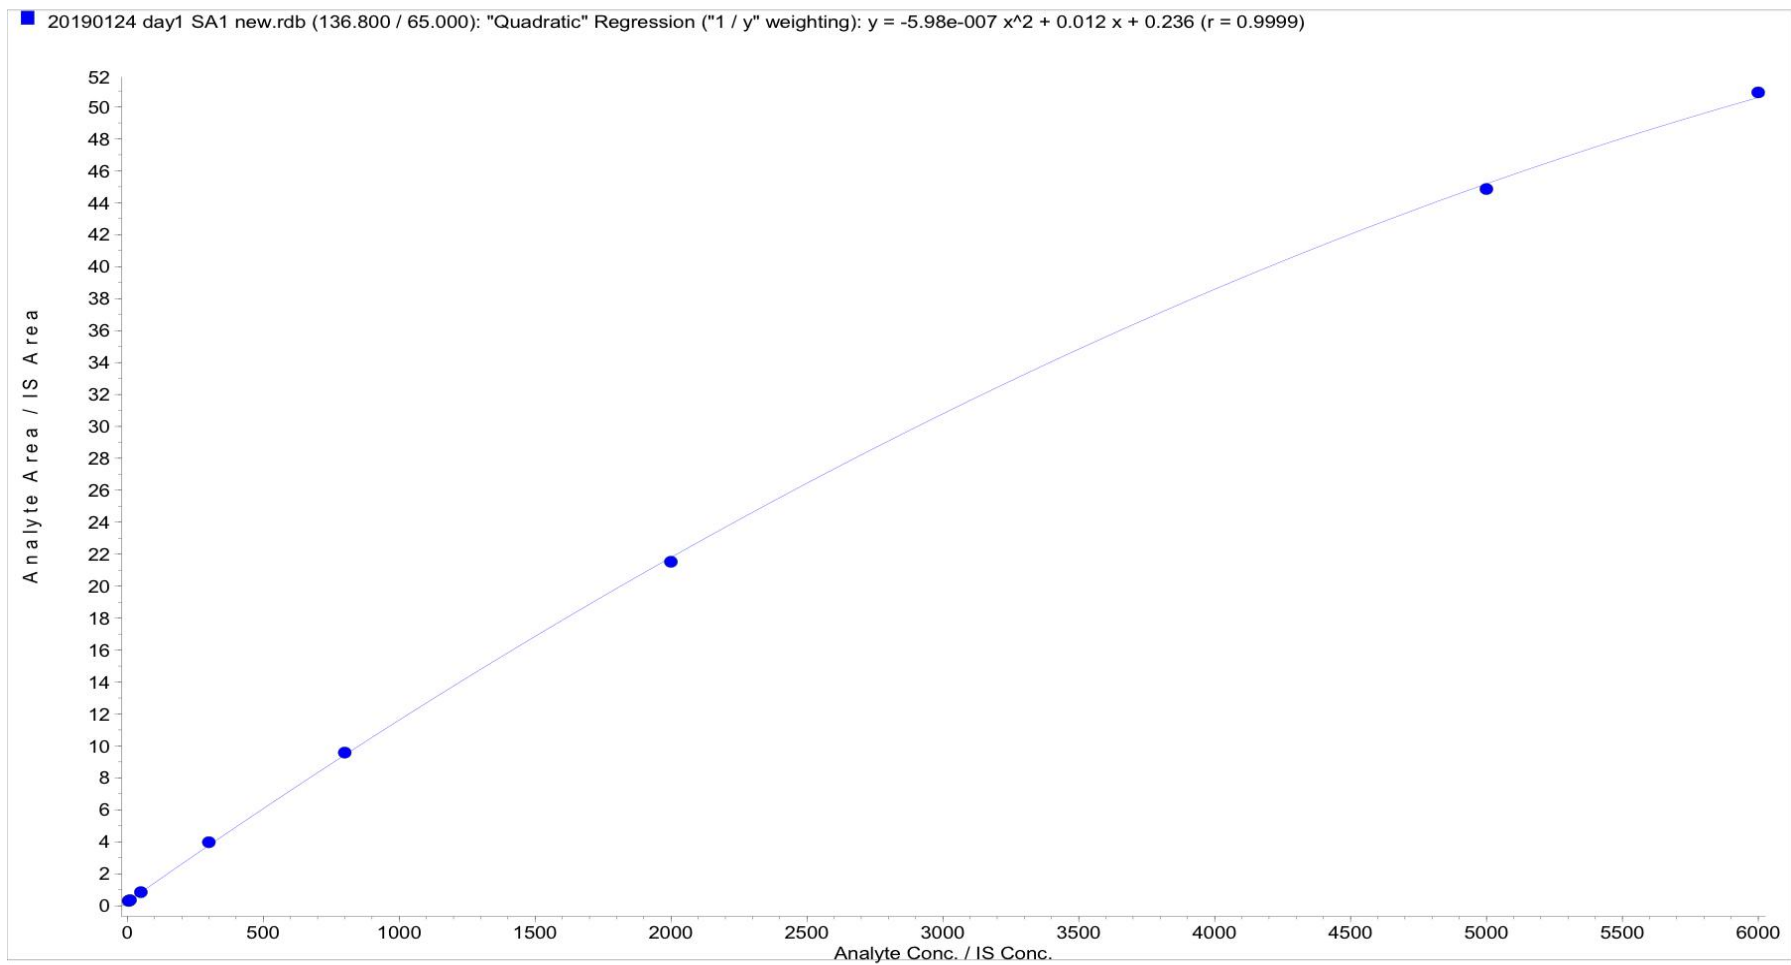

# Day2 Curve

## Sal B

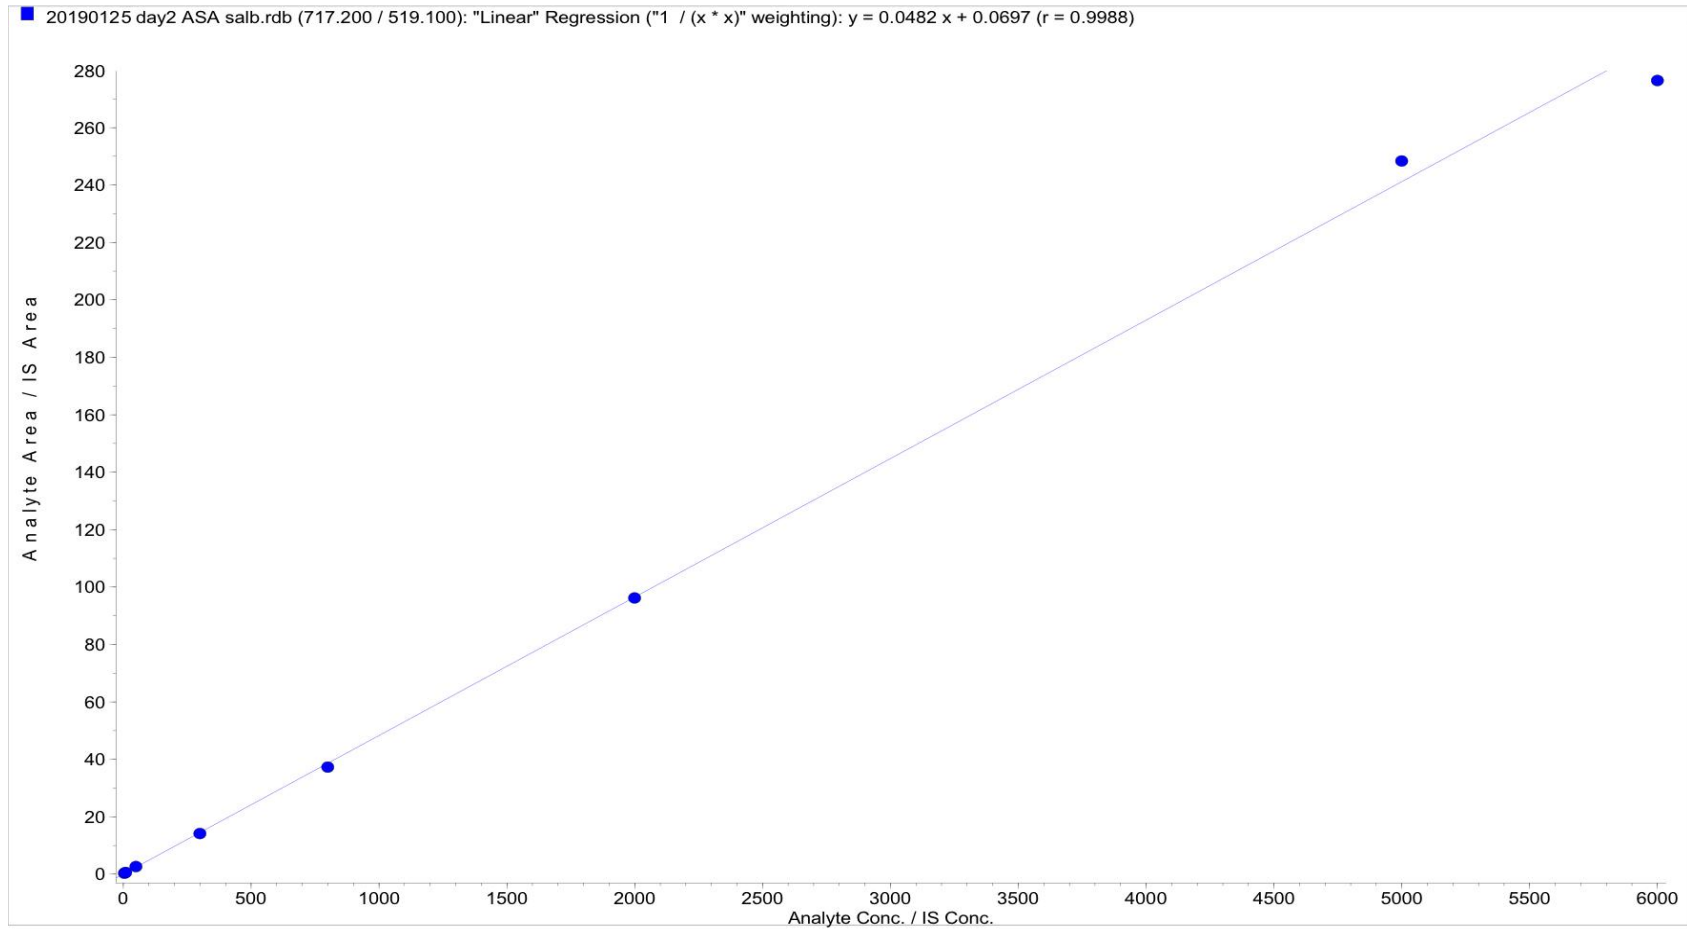

ASA

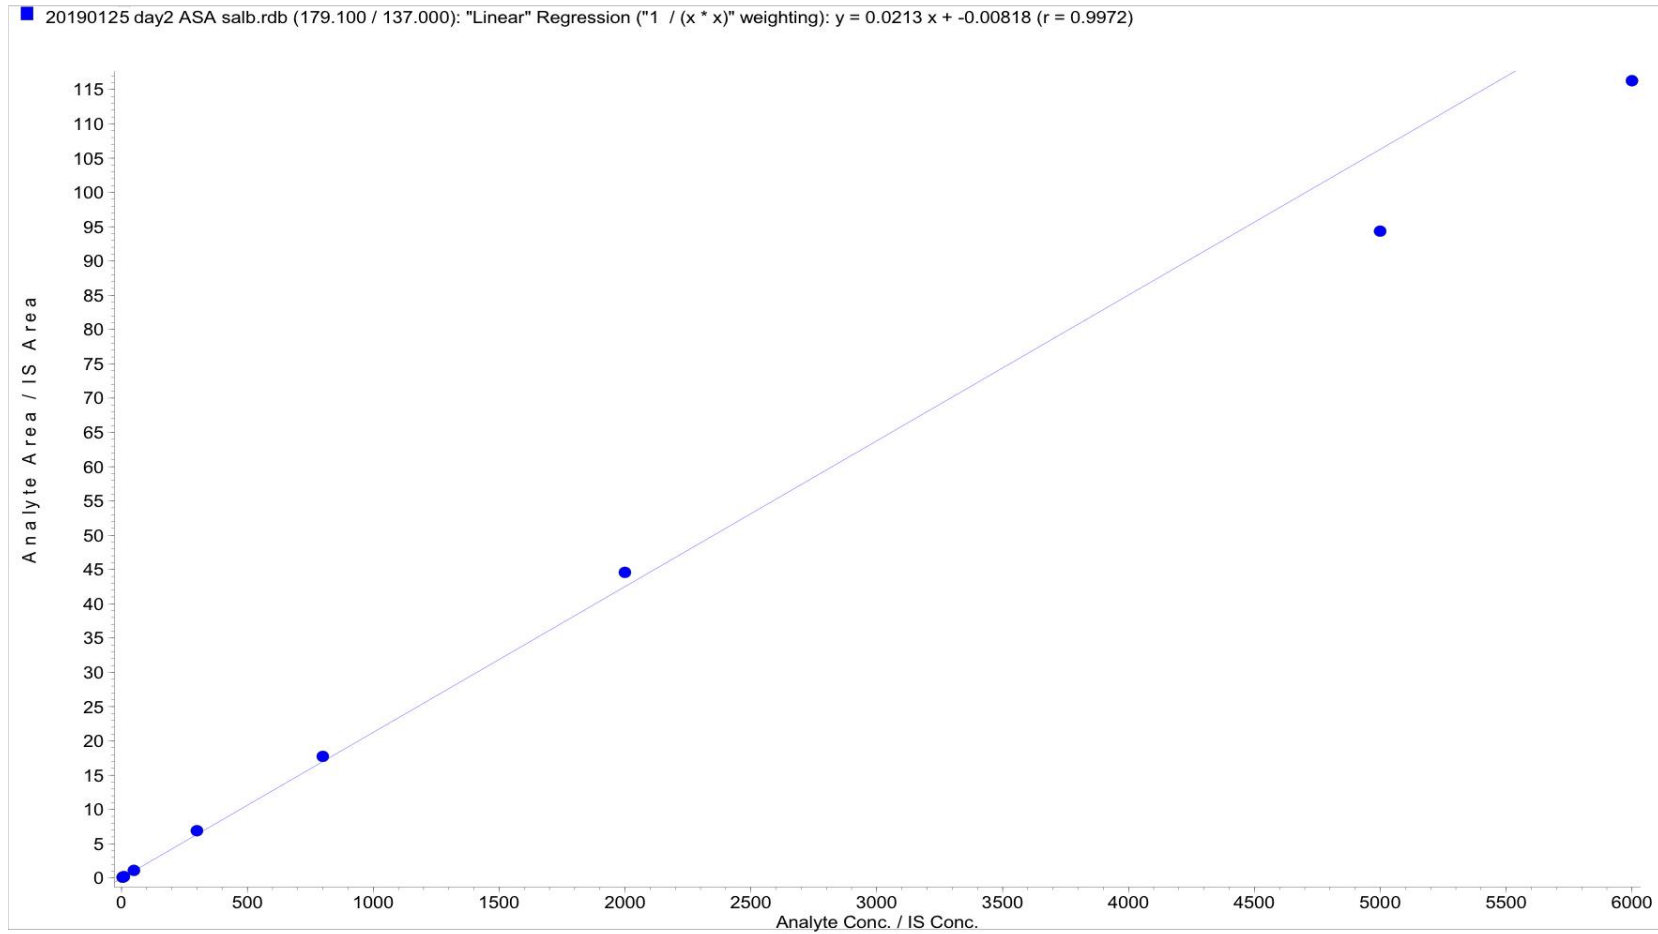

SA

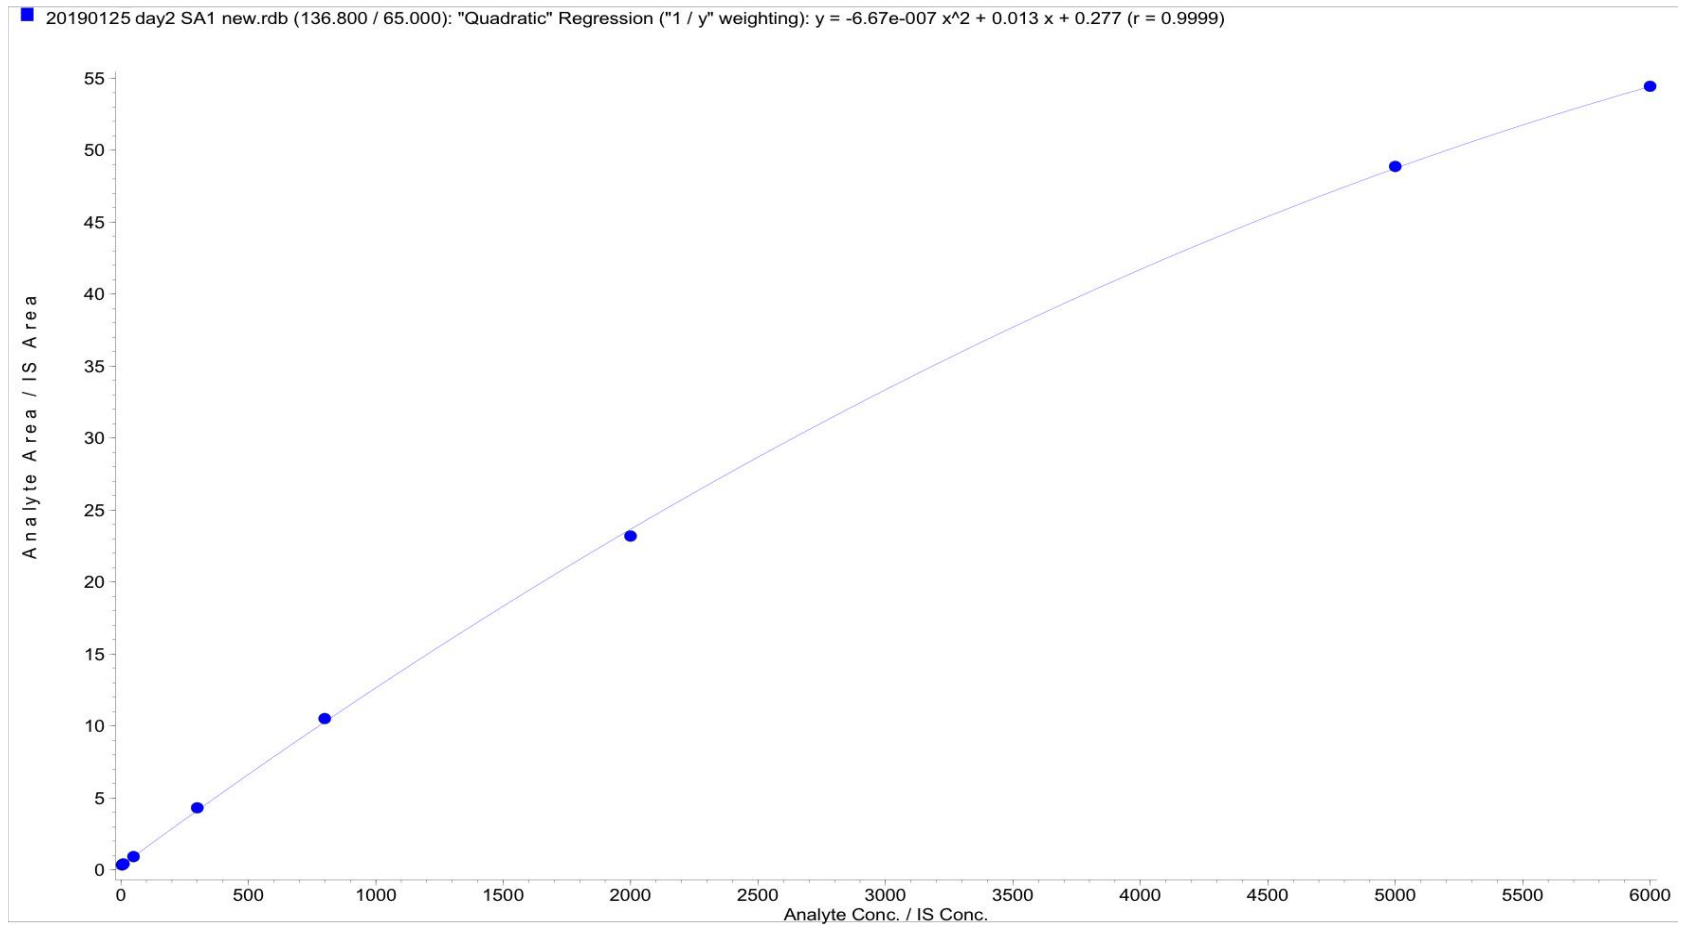

Day3 Curve

Sal B

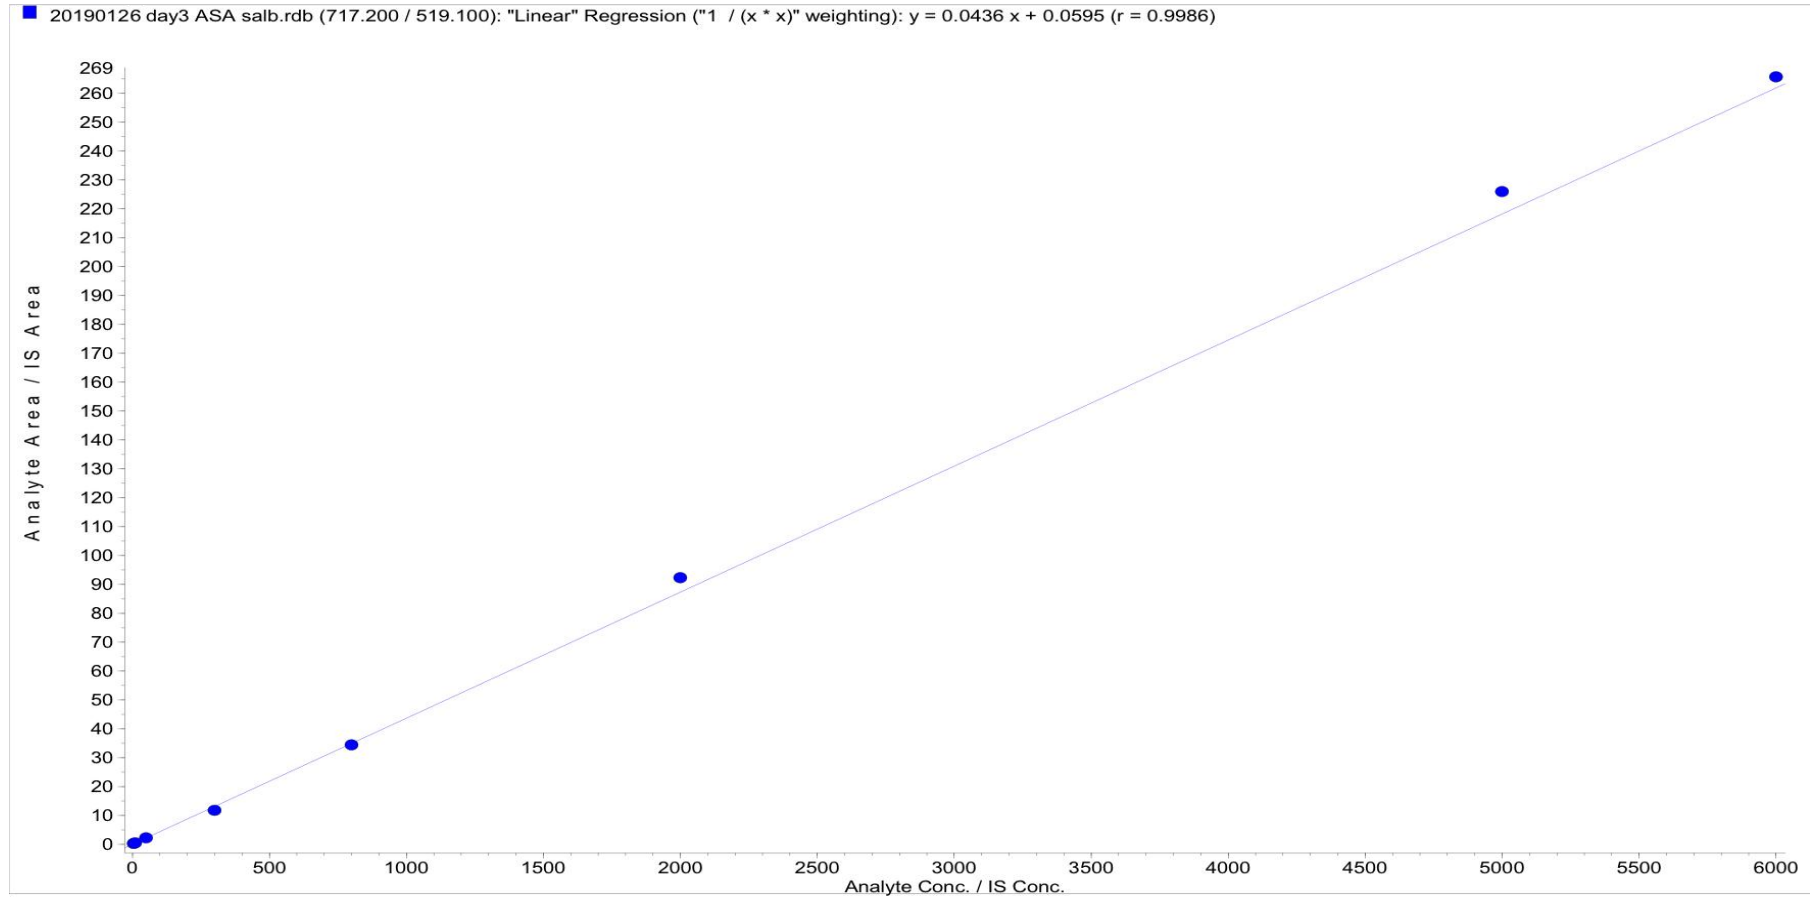

ASA

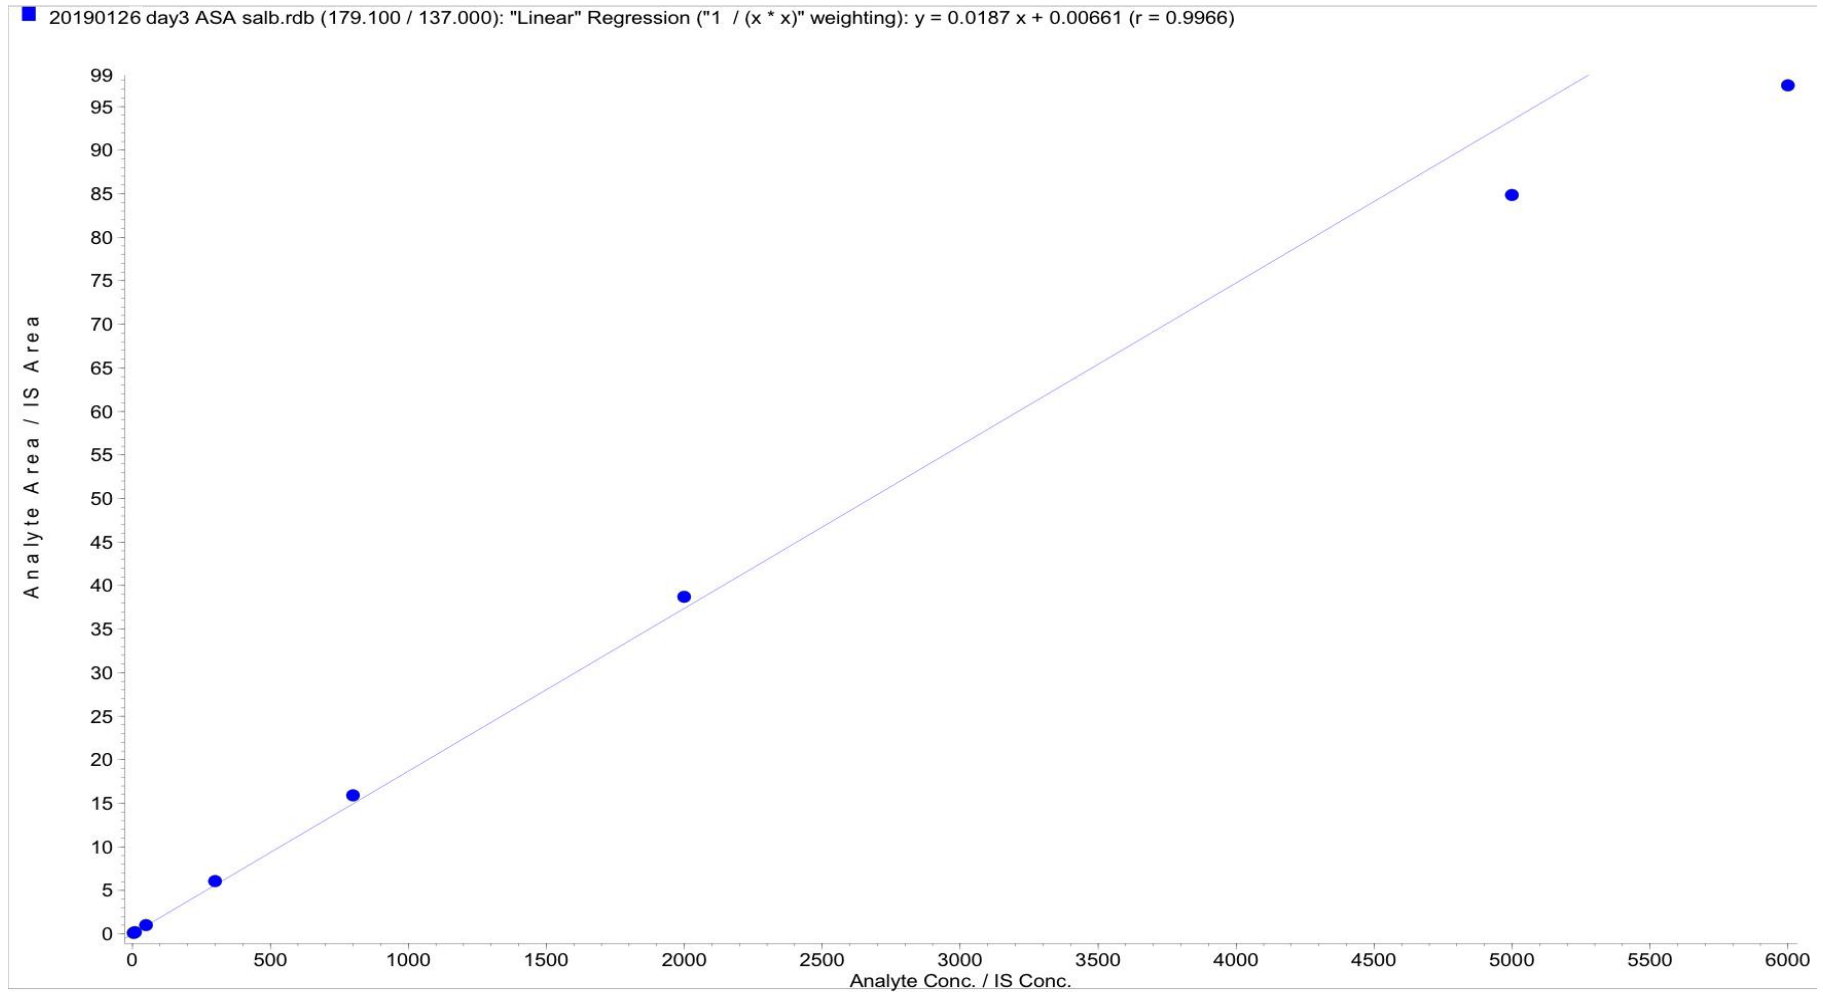



SA

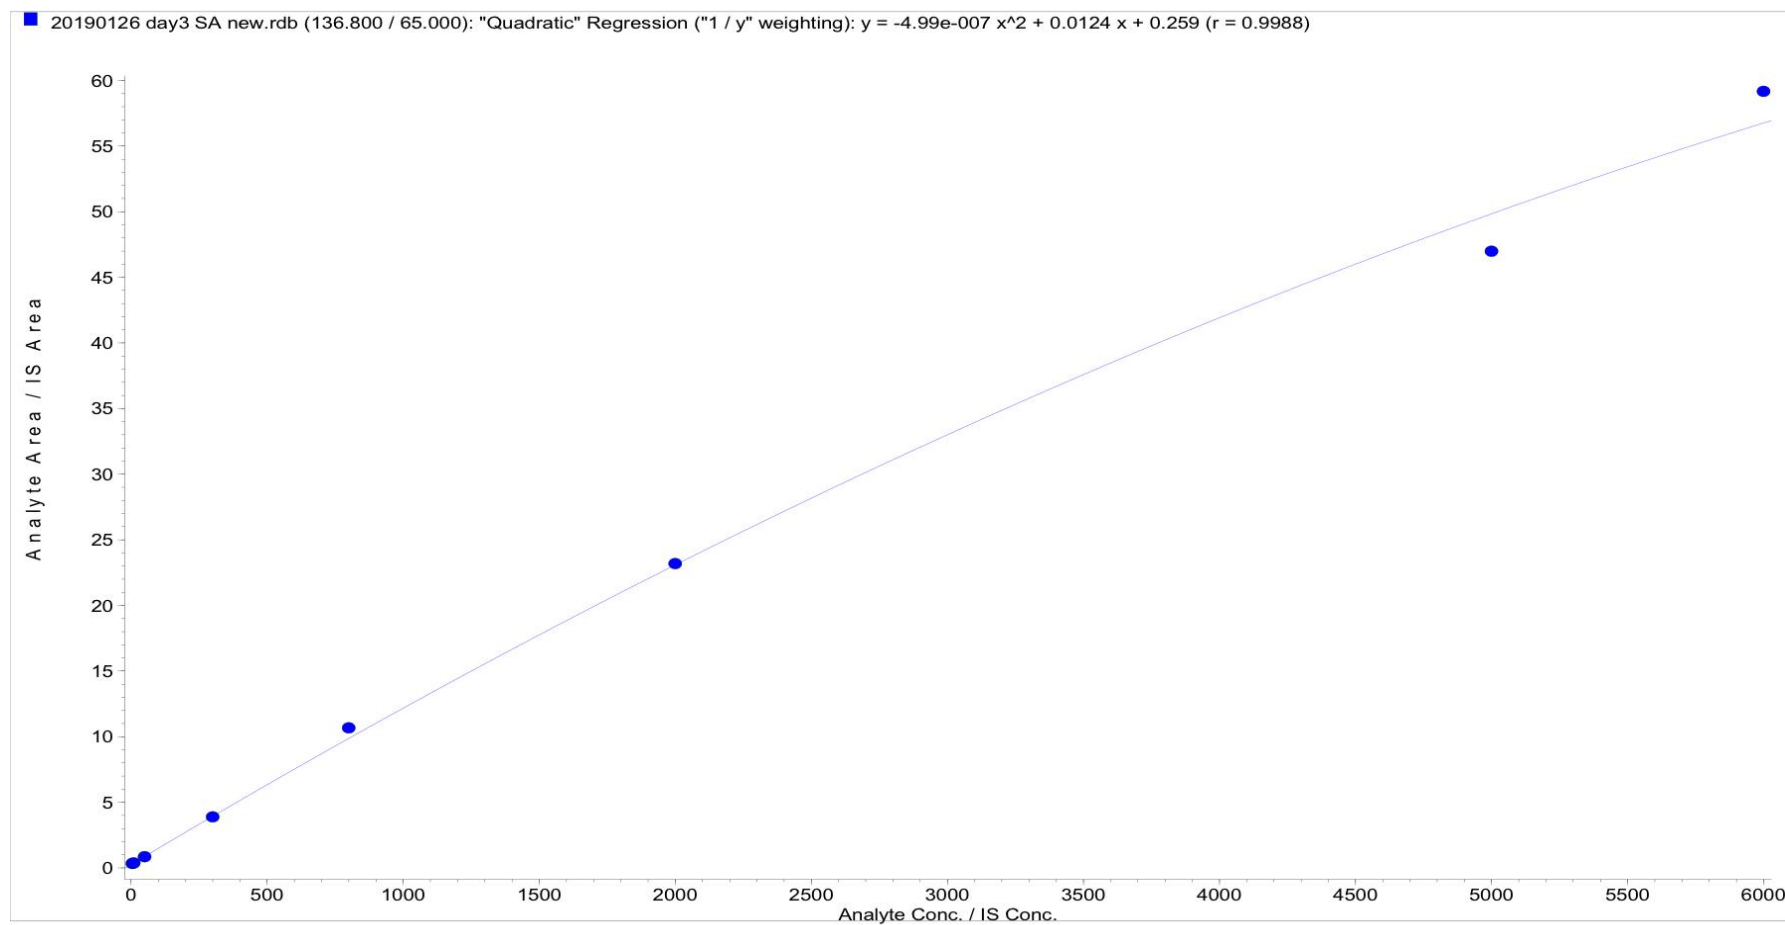

Precision and accuracy

Sal B

| Batch | LLOQ (5ng/ml) |       |           | LQC (15ng/ml) |       |           | MQC (3000ng/ml) |       |           | HQC (4500ng/ml) |       |           |
|-------|---------------|-------|-----------|---------------|-------|-----------|-----------------|-------|-----------|-----------------|-------|-----------|
|       | Conc          | Bias% | Accuracy% | Conc          | Bias% | Accuracy% | Conc            | Bias% | Accuracy% | Conc            | Bias% | Accuracy% |
| 1     | 5.36          | 7     | 107.0     | 15.5          | 3     | 103.0     | 2630            | -12.2 | 87.8      | 4310            | -4.3  | 95.7      |
|       | 5.66          | 13    | 113.0     | 14.4          | -4    | 96.0      | 2860            | -4.7  | 95.3      | 4300            | -4.4  | 95.6      |
|       | 5.09          | 2     | 102.0     | 15            | -0.2  | 99.8      | 2840            | -5.4  | 94.6      | 4120            | -8.4  | 91.6      |
|       | 5.21          | 4     | 104.0     | 15.2          | 1     | 101.0     | 2870            | -4.3  | 95.7      | 4250            | -5.5  | 94.5      |
|       | 4.9           | -2    | 98.0      | 15.4          | 3     | 103.0     | 2670            | -11   | 89.0      | 4480            | -0.4  | 99.6      |
|       | 4.27          | -14.7 | 85.3      | 15.8          | 5     | 105.0     | 2610            | -13   | 87.0      | 4220            | -6.1  | 93.9      |
| 2     | 5.15          | 3     | 103.0     | 15.10         | 0     | 100.0     | 2920            | -2.5  | 97.5      | 4150            | -7.8  | 92.2      |
|       | 5.04          | 1     | 101.0     | 13.90         | -7.3  | 92.7      | 2810            | -6.2  | 93.8      | 4030            | -10.4 | 89.6      |
|       | 4.86          | -2.8  | 97.2      | 15            | -0.2  | 99.8      | 2620            | -12.7 | 87.3      | 3980            | -11.5 | 88.5      |
|       | 5.08          | 2     | 102.0     | 14.1          | -5.9  | 94.1      | 2870            | -4.3  | 95.7      | 4220            | -6.1  | 93.9      |
|       | 4.45          | -11   | 89.0      | 14.3          | -4.4  | 95.6      | 2840            | -5.5  | 94.5      | 4060            | -9.8  | 90.2      |
|       | 4.76          | -4.8  | 95.2      | 14.8          | -1    | 99.0      | 2750            | -8.3  | 91.7      | 4210            | -6.4  | 93.6      |
| 3     | 4.76          | -4.8  | 95.2      | 15.6          | 4     | 104.0     | 2720            | -9.4  | 90.6      | 4670            | 4     | 104.0     |
|       | 5.46          | 9     | 109.0     | 13.70         | -8.5  | 91.5      | 2750            | -8.4  | 91.6      | 4640            | 3     | 103.0     |
|       | 4.7           | -6    | 94.0      | 15.60         | 4     | 104.0     | 2690            | -10.2 | 89.8      | 4440            | -1.4  | 98.6      |
|       | 5.14          | 3     | 103.0     | 16.60         | 11    | 111.0     | 2770            | -7.8  | 92.2      | 4710            | 5     | 105.0     |
|       | 4.52          | -9.6  | 90.4      | 15.8          | 6     | 106.0     | 2610            | -12.8 | 87.2      | 4640            | 3     | 103.0     |
|       | 4.49          | -10.1 | 89.9      | 15.40         | 3     | 103.0     | 2590            | -13.8 | 86.2      | 4570            | 2     | 102.0     |

ASA

| Batch | LLOQ (5ng/ml) |       |           | LQC (15ng/ml) |       |           | MQC (3000ng/ml) |       |           | HQC (4500ng/ml) |       |           |
|-------|---------------|-------|-----------|---------------|-------|-----------|-----------------|-------|-----------|-----------------|-------|-----------|
|       | Conc          | Bias% | Accuracy% | Conc          | Bias% | Accuracy% | Conc            | Bias% | Accuracy% | Conc            | Bias% | Accuracy% |
| 1     | 4.78          | -4.4  | 95.6      | 12.8          | -14.8 | 85.2      | 3070            | 2     | 102.0     | 4130            | -8.2  | 91.8      |
|       | 4.87          | -2.7  | 97.3      | 14.5          | -3.5  | 96.5      | 3170            | 6     | 106.0     | 4120            | -8.5  | 91.5      |
|       | 4.52          | -9.6  | 90.4      | 13.9          | -7.3  | 92.7      | 3350            | 12    | 112.0     | 4080            | -9.3  | 90.7      |
|       | 4.67          | -6.6  | 93.4      | 14            | -6.8  | 93.2      | 3400            | 13    | 113.0     | 4310            | -4.2  | 95.8      |
|       | 4.32          | -13.7 | 86.3      | 13.5          | -9.9  | 90.1      | 3220            | 7     | 107.0     | 4480            | -0.5  | 99.5      |
|       | 4.66          | -6.8  | 93.2      | 14.1          | -6.1  | 93.9      | 3030            | 1     | 101.0     | 4210            | -6.4  | 93.6      |
| 2     | 5.83          | 17    | 117.0     | 14.8          | -1.6  | 98.4      | 3400            | 13    | 113.0     | 4040            | -10.3 | 89.7      |
|       | 5.08          | 2     | 102.0     | 14.5          | -3.4  | 96.6      | 3240            | 8     | 108.0     | 3890            | -13.5 | 86.5      |
|       | 5.36          | 7     | 107.0     | 13.8          | -8    | 92.0      | 3180            | 6     | 106.0     | 3910            | -13.1 | 86.9      |
|       | 5.44          | 9     | 109.0     | 14            | -6.7  | 93.3      | 3320            | 11    | 111.0     | 4250            | -5.5  | 94.5      |
|       | 5.44          | 9     | 109.0     | 15.3          | 2     | 102.0     | 3160            | 5     | 105.0     | 3870            | -14.1 | 85.9      |
|       | 5.5           | 10    | 110.0     | 14.7          | -1.7  | 98.3      | 3220            | 7     | 107.0     | 4040            | -10.2 | 89.8      |

|   |      |       |       |      |      |       |      |      |       |      |      |      |
|---|------|-------|-------|------|------|-------|------|------|-------|------|------|------|
| 3 | 4.48 | -10.5 | 89.5  | 14.5 | -3.1 | 96.9  | 2960 | -1.2 | 98.8  | 4480 | -0.4 | 99.6 |
|   | 5.24 | 5     | 105.0 | 16.5 | 10   | 110.0 | 2930 | -2.2 | 97.8  | 4340 | -3.6 | 96.4 |
|   | 4.69 | -6.3  | 93.7  | 14.9 | -0.9 | 99.1  | 3070 | 2    | 102.0 | 4130 | -8.3 | 91.7 |
|   | 5.02 | 0     | 100.0 | 13.8 | -7.7 | 92.3  | 3240 | 8    | 108.0 | 4470 | -0.7 | 99.3 |
|   | 4.61 | -7.7  | 92.3  | 14.6 | -2.4 | 97.6  | 3030 | 1    | 101.0 | 4210 | -6.5 | 93.5 |
|   | 4.76 | -4.8  | 95.2  | 14.4 | -4   | 96.0  | 2990 | -0.2 | 99.8  | 4360 | -3.1 | 96.9 |

SA

| Batch | LLOQ (5ng/ml) |       |           | LQC (15ng/ml) |       |           | MQC (3000ng/ml) |       |           | HQC (4500ng/ml) |       |           |
|-------|---------------|-------|-----------|---------------|-------|-----------|-----------------|-------|-----------|-----------------|-------|-----------|
|       | Conc          | Bias% | Accuracy% | Conc          | Bias% | Accuracy% | Conc            | Bias% | Accuracy% | Conc            | Bias% | Accuracy% |
| 1     | 5.15          | 3     | 103.0     | 16.5          | 10    | 110.0     | 2660            | -11.4 | 88.6      | 4370            | -2.9  | 97.1      |
|       | 4.92          | -1.6  | 98.4      | 16            | 6     | 106.0     | 2660            | -11.2 | 88.8      | 4320            | -4.1  | 95.9      |
|       | 6.01          | 20    | 120.0     | 16.7          | 11    | 111.0     | 2700            | -10.2 | 89.8      | 4140            | -7.9  | 92.1      |
|       | 5.32          | 6     | 106.0     | 14.5          | -3.4  | 96.6      | 2800            | -6.8  | 93.2      | 4340            | -3.6  | 96.4      |
|       | 5             | -0.1  | 99.9      | 15.2          | 2     | 102.0     | 2580            | -14.1 | 85.9      | 4190            | -6.9  | 93.1      |
|       | 5.87          | 17    | 117.0     | 16.1          | 7     | 107.0     | 2580            | -14   | 86.0      | 4180            | -7    | 93.0      |
| 2     | 5.23          | 5     | 105.0     | 14.5          | -3.4  | 96.6      | 2650            | -11.7 | 88.3      | 4130            | -8.3  | 91.7      |
|       | 4.9           | -2.1  | 97.9      | 14.2          | -5    | 95.0      | 2780            | -7.5  | 92.5      | 4070            | -9.5  | 90.5      |
|       | 5.1           | 2     | 102.0     | 16            | 7     | 107.0     | 2610            | -12.9 | 87.1      | 4040            | -10.3 | 89.7      |
|       | 5.02          | 0     | 100.0     | 16.6          | 10    | 110.0     | 2600            | -13.4 | 86.6      | 4300            | -4.5  | 95.5      |
|       | 5.66          | 13    | 113.0     | 13.2          | -12.1 | 87.9      | 2630            | -12.5 | 87.5      | 3870            | -14   | 86.0      |
|       | 4.66          | -6.7  | 93.3      | 16.8          | 12    | 112.0     | 2660            | -11.4 | 88.6      | 4250            | -5.6  | 94.4      |
| 3     | 4.37          | -12.7 | 87.3      | 16            | 7     | 107.0     | 3010            | 0     | 100.0     | 4480            | -0.5  | 99.5      |
|       | 4.27          | -14.6 | 85.4      | 15.8          | 6     | 106.0     | 2960            | -1.2  | 98.8      | 4590            | 2     | 102.0     |
|       | 5.85          | 17    | 117.0     | 16.2          | 8     | 108.0     | 2820            | -6    | 94.0      | 4390            | -2.4  | 97.6      |
|       | 5.39          | 8     | 108.0     | 15.3          | 2     | 102.0     | 2850            | -5    | 95.0      | 4560            | 1     | 101.0     |
|       | 4.65          | -7    | 93.0      | 16.3          | 8     | 108.0     | 2740            | -8.6  | 91.4      | 4540            | 1     | 101.0     |
|       | 5.2           | 4     | 104.0     | 15.8          | 5     | 105.0     | 2920            | -2.7  | 97.3      | 4470            | -0.7  | 99.3      |

Matrix Effect

| Sal B           |                               |                                   |                    |                                  |                                      |                       |
|-----------------|-------------------------------|-----------------------------------|--------------------|----------------------------------|--------------------------------------|-----------------------|
|                 | Peak area<br>in blank solvent | Peak area<br>in pretreated plasma | Matrix Effect<br>% | IS peak area<br>in blank solvent | IS peak area<br>in pretreated plasma | IS-normalized ME<br>% |
| LQC (15ng/ml)   | 7.67E+03                      | 7.22E+03                          | 94.13              | 5.68E+04                         | 6.22E+04                             | 85.96                 |
|                 | 7.46E+03                      | 7.55E+03                          | 101.21             | 5.82E+04                         | 6.32E+04                             | 93.20                 |
|                 | 7.83E+03                      | 7.59E+03                          | 96.93              | 5.87E+04                         | 6.45E+04                             | 88.22                 |
|                 | 7.10E+03                      | 7.43E+03                          | 104.65             | 5.68E+04                         | 6.44E+04                             | 92.30                 |
|                 | 7.44E+03                      | 7.49E+03                          | 100.67             | 5.75E+04                         | 6.22E+04                             | 93.06                 |
|                 | 7.24E+03                      | 7.64E+03                          | 105.52             | 5.89E+04                         | 6.22E+04                             | 99.93                 |
| MQC (3000ng/ml) | 1.20E+06                      | 1.21E+06                          | 100.83             | 5.68E+04                         | 6.22E+04                             | 92.08                 |
|                 | 1.16E+06                      | 1.15E+06                          | 99.14              | 5.82E+04                         | 6.32E+04                             | 91.29                 |
|                 | 1.20E+06                      | 1.22E+06                          | 101.67             | 5.87E+04                         | 6.45E+04                             | 92.52                 |
|                 | 1.16E+06                      | 1.28E+06                          | 110.34             | 5.68E+04                         | 6.44E+04                             | 97.32                 |
|                 | 1.21E+06                      | 1.22E+06                          | 100.83             | 5.75E+04                         | 6.22E+04                             | 93.21                 |
|                 | 1.24E+06                      | 1.28E+06                          | 103.23             | 5.89E+04                         | 6.22E+04                             | 97.75                 |
| HQC (4500ng/ml) | 2.06E+06                      | 2.07E+06                          | 100.49             | 5.68E+04                         | 6.22E+04                             | 91.76                 |
|                 | 2.09E+06                      | 2.00E+06                          | 95.69              | 5.82E+04                         | 6.32E+04                             | 88.12                 |
|                 | 2.11E+06                      | 2.13E+06                          | 100.95             | 5.87E+04                         | 6.45E+04                             | 91.87                 |
|                 | 2.09E+06                      | 2.13E+06                          | 101.91             | 5.68E+04                         | 6.44E+04                             | 89.89                 |
|                 | 2.10E+06                      | 1.98E+06                          | 94.29              | 5.89E+04                         | 6.22E+04                             | 89.28                 |
|                 | 2.09E+06                      | 2.19E+06                          | 104.78             | 5.75E+04                         | 6.22E+04                             | 96.87                 |

| ASA             |                               |                                   |                    |                                  |                                      |                       |
|-----------------|-------------------------------|-----------------------------------|--------------------|----------------------------------|--------------------------------------|-----------------------|
|                 | Peak area<br>in blank solvent | Peak area<br>in pretreated plasma | Matrix Effect<br>% | IS peak area<br>in blank solvent | IS peak area<br>in pretreated plasma | IS-normalized ME<br>% |
| LQC (15ng/ml)   | 9.62E+03                      | 1.02E+04                          | 106.03             | 5.68E+04                         | 6.22E+04                             | 96.82                 |
|                 | 1.00E+04                      | 1.04E+04                          | 104.00             | 5.82E+04                         | 6.32E+04                             | 95.77                 |
|                 | 1.07E+04                      | 1.08E+04                          | 100.93             | 5.87E+04                         | 6.45E+04                             | 91.86                 |
|                 | 9.85E+03                      | 1.00E+04                          | 101.52             | 5.68E+04                         | 6.44E+04                             | 89.54                 |
|                 | 1.17E+04                      | 1.15E+04                          | 98.29              | 5.75E+04                         | 6.22E+04                             | 90.86                 |
|                 | 9.80E+03                      | 9.86E+03                          | 100.61             | 5.89E+04                         | 6.22E+04                             | 95.27                 |
| MQC (3000ng/ml) | 2.73E+06                      | 2.69E+06                          | 98.53              | 5.76E+04                         | 6.37E+04                             | 89.10                 |

|                 |          |          |        |          |          |       |
|-----------------|----------|----------|--------|----------|----------|-------|
|                 | 2.75E+06 | 2.67E+06 | 97.09  | 5.83E+04 | 6.06E+04 | 93.41 |
|                 | 2.80E+06 | 2.73E+06 | 97.50  | 5.80E+04 | 6.02E+04 | 93.94 |
|                 | 2.74E+06 | 2.79E+06 | 101.82 | 5.72E+04 | 6.14E+04 | 94.86 |
|                 | 2.70E+06 | 2.62E+06 | 97.04  | 5.89E+04 | 5.85E+04 | 97.70 |
|                 | 2.80E+06 | 2.57E+06 | 91.79  | 6.02E+04 | 6.10E+04 | 90.58 |
| HQC (4500ng/ml) | 3.79E+06 | 3.84E+06 | 101.32 | 5.68E+04 | 6.22E+04 | 92.52 |
|                 | 3.86E+06 | 3.83E+06 | 99.22  | 5.82E+04 | 6.32E+04 | 91.37 |
|                 | 3.77E+06 | 3.82E+06 | 101.33 | 5.87E+04 | 6.45E+04 | 92.21 |
|                 | 3.87E+06 | 3.94E+06 | 101.81 | 5.68E+04 | 6.44E+04 | 89.79 |
|                 | 3.83E+06 | 3.74E+06 | 97.65  | 5.89E+04 | 6.22E+04 | 92.47 |
|                 | 3.87E+06 | 3.98E+06 | 102.84 | 5.75E+04 | 6.22E+04 | 95.07 |

| SA              |                               |                                   |                    |                                  |                                      |                       |
|-----------------|-------------------------------|-----------------------------------|--------------------|----------------------------------|--------------------------------------|-----------------------|
|                 | Peak area<br>in blank solvent | Peak area<br>in pretreated plasma | Matrix Effect<br>% | IS peak area<br>in blank solvent | IS peak area<br>in pretreated plasma | IS-normalized ME<br>% |
| LQC (15ng/ml)   | 1.94E+04                      | 2.17E+04                          | 111.86             | 5.68E+04                         | 6.22E+04                             | 102.14                |
|                 | 2.33E+04                      | 2.21E+04                          | 94.85              | 5.82E+04                         | 6.32E+04                             | 87.35                 |
|                 | 1.95E+04                      | 2.20E+04                          | 112.82             | 5.87E+04                         | 6.45E+04                             | 102.68                |
|                 | 1.92E+04                      | 2.10E+04                          | 109.38             | 5.68E+04                         | 6.44E+04                             | 96.47                 |
|                 | 2.25E+04                      | 2.20E+04                          | 97.78              | 5.75E+04                         | 6.22E+04                             | 90.39                 |
|                 | 1.87E+04                      | 2.05E+04                          | 109.63             | 5.89E+04                         | 6.22E+04                             | 103.81                |
| MQC (3000ng/ml) | 1.53E+06                      | 1.52E+06                          | 99.35              | 6.06E+04                         | 6.22E+04                             | 96.79                 |
|                 | 1.54E+06                      | 1.46E+06                          | 94.81              | 6.25E+04                         | 6.13E+04                             | 96.66                 |
|                 | 1.56E+06                      | 1.52E+06                          | 97.44              | 5.94E+04                         | 5.97E+04                             | 96.95                 |
|                 | 1.48E+06                      | 1.48E+06                          | 100.00             | 5.80E+04                         | 6.30E+04                             | 92.06                 |
|                 | 1.54E+06                      | 1.46E+06                          | 94.81              | 6.04E+04                         | 5.97E+04                             | 95.92                 |
|                 | 1.58E+06                      | 1.48E+06                          | 93.67              | 5.98E+04                         | 6.11E+04                             | 91.68                 |
| HQC (4500ng/ml) | 2.09E+06                      | 2.01E+06                          | 96.17              | 5.98E+04                         | 6.11E+04                             | 94.13                 |
|                 | 2.14E+06                      | 2.02E+06                          | 94.39              | 6.25E+04                         | 6.13E+04                             | 96.24                 |
|                 | 2.07E+06                      | 2.00E+06                          | 96.62              | 5.94E+04                         | 5.97E+04                             | 96.13                 |
|                 | 2.08E+06                      | 2.08E+06                          | 100.00             | 6.06E+04                         | 6.22E+04                             | 97.43                 |
|                 | 2.10E+06                      | 1.99E+06                          | 94.76              | 6.04E+04                         | 5.97E+04                             | 95.87                 |
|                 | 2.08E+06                      | 2.04E+06                          | 98.08              | 5.80E+04                         | 6.30E+04                             | 90.29                 |

| IS |                               |                                   |                    |
|----|-------------------------------|-----------------------------------|--------------------|
|    | Peak area<br>in blank solvent | Peak area<br>in pretreated plasma | Matrix Effect<br>% |
|    | 5.68E+04                      | 6.22E+04                          | 109.51             |
|    | 5.82E+04                      | 6.32E+04                          | 108.59             |
|    | 5.87E+04                      | 6.45E+04                          | 109.88             |
|    | 5.68E+04                      | 6.44E+04                          | 113.38             |
|    | 5.75E+04                      | 6.22E+04                          | 108.17             |
|    | 5.89E+04                      | 6.22E+04                          | 105.60             |

Recovery

| SalB | LQC (15ng/ml) |                                   |           | MQC (3000ng/ml) |                                   |           | HQC (4500ng/ml) |                                   |           |
|------|---------------|-----------------------------------|-----------|-----------------|-----------------------------------|-----------|-----------------|-----------------------------------|-----------|
|      | Peak area     | Peak area<br>in pretreated plasma | Recovery% | Peak area       | Peak area<br>in pretreated plasma | Recovery% | Peak area       | Peak area<br>in pretreated plasma | Recovery% |
|      | 6.41E+03      | 7.22E+03                          | 88.78     | 1.07E+06        | 1.21E+06                          | 88.43     | 1.79E+06        | 2.07E+06                          | 86.47     |
|      | 6.29E+03      | 7.55E+03                          | 83.31     | 1.06E+06        | 1.15E+06                          | 92.17     | 1.84E+06        | 2.00E+06                          | 92.00     |
|      | 6.62E+03      | 7.59E+03                          | 87.22     | 1.03E+06        | 1.22E+06                          | 84.43     | 1.77E+06        | 2.13E+06                          | 83.10     |
|      | 5.97E+03      | 7.43E+03                          | 80.35     | 1.07E+06        | 1.28E+06                          | 83.59     | 1.79E+06        | 2.13E+06                          | 84.04     |
|      | 5.79E+03      | 7.49E+03                          | 77.30     | 1.01E+06        | 1.22E+06                          | 82.79     | 1.87E+06        | 1.98E+06                          | 94.44     |
|      | 6.31E+03      | 7.64E+03                          | 82.59     | 1.03E+06        | 1.28E+06                          | 80.47     | 1.82E+06        | 2.19E+06                          | 83.11     |

| ASA | LQC (15ng/ml) |                                   |           | MQC (3000ng/ml) |                                   |           | HQC (4500ng/ml) |                                   |           |
|-----|---------------|-----------------------------------|-----------|-----------------|-----------------------------------|-----------|-----------------|-----------------------------------|-----------|
|     | Peak area     | Peak area<br>in pretreated plasma | Recovery% | Peak area       | Peak area<br>in pretreated plasma | Recovery% | Peak area       | Peak area<br>in pretreated plasma | Recovery% |
|     | 9.18E+03      | 1.02E+04                          | 90.00     | 2.67E+06        | 2.69E+06                          | 99.26     | 3.58E+06        | 3.84E+06                          | 93.23     |
|     | 1.05E+04      | 1.04E+04                          | 100.96    | 2.50E+06        | 2.67E+06                          | 93.63     | 3.63E+06        | 3.83E+06                          | 94.78     |
|     | 1.04E+04      | 1.08E+04                          | 96.30     | 2.54E+06        | 2.73E+06                          | 93.04     | 3.48E+06        | 3.82E+06                          | 91.10     |
|     | 1.01E+04      | 1.00E+04                          | 101.00    | 2.68E+06        | 2.79E+06                          | 96.06     | 3.70E+06        | 3.94E+06                          | 93.91     |
|     | 1.03E+04      | 9.86E+03                          | 104.46    | 2.54E+06        | 2.62E+06                          | 96.95     | 3.56E+06        | 3.74E+06                          | 95.19     |
|     | 1.09E+04      | 1.15E+04                          | 94.78     | 2.54E+06        | 2.57E+06                          | 98.83     | 3.62E+06        | 3.98E+06                          | 90.95     |

| SA | LQC (15ng/ml) |                                   |           | MQC (3000ng/ml) |                                   |           | HQC (4500ng/ml) |                                   |           |
|----|---------------|-----------------------------------|-----------|-----------------|-----------------------------------|-----------|-----------------|-----------------------------------|-----------|
|    | Peak area     | Peak area<br>in pretreated plasma | Recovery% | Peak area       | Peak area<br>in pretreated plasma | Recovery% | Peak area       | Peak area<br>in pretreated plasma | Recovery% |
|    | 2.01E+04      | 2.10E+04                          | 95.71     | 1.42E+06        | 1.52E+06                          | 93.42     | 1.92E+06        | 2.01E+06                          | 95.52     |
|    | 1.97E+04      | 1.99E+04                          | 98.99     | 1.39E+06        | 1.46E+06                          | 95.21     | 1.96E+06        | 2.02E+06                          | 97.03     |
|    | 1.92E+04      | 2.17E+04                          | 88.48     | 1.41E+06        | 1.52E+06                          | 92.76     | 1.88E+06        | 2.00E+06                          | 94.00     |
|    | 1.95E+04      | 2.05E+04                          | 95.12     | 1.42E+06        | 1.48E+06                          | 95.95     | 1.93E+06        | 2.08E+06                          | 92.79     |
|    | 2.03E+04      | 2.20E+04                          | 92.27     | 1.38E+06        | 1.46E+06                          | 94.52     | 1.95E+06        | 1.99E+06                          | 97.99     |
|    | 1.95E+04      | 2.21E+04                          | 88.24     | 1.42E+06        | 1.48E+06                          | 95.95     | 1.91E+06        | 2.04E+06                          | 93.63     |

| IS       | Peak area | Peak area<br>in pretreated plasma | Recovery% |
|----------|-----------|-----------------------------------|-----------|
|          | 5.61E+04  | 6.22E+04                          |           |
| 5.81E+04 | 6.32E+04  | 108.78                            |           |
| 6.14E+04 | 6.45E+04  | 105.05                            |           |
| 5.71E+04 | 6.44E+04  | 112.78                            |           |
| 5.74E+04 | 6.22E+04  | 108.36                            |           |
| 6.45E+04 | 6.22E+04  | 96.43                             |           |



## Stability

Sal B

| Long 60 day            | LQC (15ng/ml) |       |           | MQC (3000ng/ml) |       |           | HQC (4500ng/ml) |       |           |
|------------------------|---------------|-------|-----------|-----------------|-------|-----------|-----------------|-------|-----------|
|                        | Conc.         | Bias% | Accuracy% | Conc.           | Bias% | Accuracy% | Conc.           | Bias% | Accuracy% |
|                        | 15            | 0     | 100       | 2880            | -4    | 96        | 4560            | 1     | 101       |
|                        | 16.4          | 9     | 109       | 2890            | -3.6  | 96.4      | 4530            | 1     | 101       |
|                        | 16.8          | 12    | 112       | 2890            | -3.8  | 96.2      | 4090            | -9.1  | 90.9      |
|                        | 15.2          | 2     | 102       | 3010            | 0     | 100       | 4560            | 1     | 101       |
|                        | 15.4          | 2     | 102       | 2990            | -0.5  | 99.5      | 4420            | -1.7  | 98.3      |
|                        | 16.7          | 11    | 111       | 2860            | -4.8  | 95.2      | 4470            | -0.8  | 99.2      |
| Short 4h (acidified)   | LQC (15ng/ml) |       |           | MQC (3000ng/ml) |       |           | HQC (4500ng/ml) |       |           |
|                        | Conc.         | Bias% | Accuracy% | Conc.           | Bias% | Accuracy% | Conc.           | Bias% | Accuracy% |
|                        | 16.1          | 8     | 108       | 2810            | -6.4  | 93.6      | 4770            | 6     | 106       |
|                        | 15.2          | 1     | 101       | 2800            | -6.6  | 93.4      | 4170            | -7.4  | 92.6      |
|                        | 13.8          | -7.8  | 92.2      | 2630            | -12.3 | 87.7      | 4090            | -9.1  | 90.9      |
|                        | 16.4          | 10    | 110       | 2780            | -7.3  | 92.7      | 4660            | 3     | 103       |
|                        | 15            | 0     | 100       | 2870            | -4.2  | 95.8      | 4400            | -2.1  | 97.9      |
|                        | 14.5          | -3.1  | 96.9      | 2710            | -9.6  | 90.4      | 4130            | -8.3  | 91.7      |
| 24h in autosampler     | LQC (15ng/ml) |       |           | MQC (3000ng/ml) |       |           | HQC (4500ng/ml) |       |           |
|                        | Conc.         | Bias% | Accuracy% | Conc.           | Bias% | Accuracy% | Conc.           | Bias% | Accuracy% |
|                        | 17            | 14    | 114       | 3110            | 4     | 104       | 4090            | -9.1  | 90.9      |
|                        | 17.1          | 14    | 114       | 2950            | -1.8  | 98.2      | 4780            | 6     | 106       |
|                        | 16.1          | 7     | 107       | 3080            | 3     | 103       | 4600            | 2     | 102       |
| Short 4h (unacidified) | LQC (15ng/ml) |       |           | MQC (3000ng/ml) |       |           | HQC (4500ng/ml) |       |           |
|                        | Conc.         | Bias% | Accuracy% | Conc.           | Bias% | Accuracy% | Conc.           | Bias% | Accuracy% |
|                        | 11            | -26.7 | 73.3      | 2510            | -16.3 | 83.7      | 4110            | -8.6  | 91.4      |
|                        | 10.7          | -28.7 | 71.3      | 2620            | -12.8 | 87.2      | 3930            | -12.7 | 87.3      |
|                        | 9.21          | -38.6 | 61.4      | 2570            | -14.3 | 85.7      | 3870            | -14.1 | 85.9      |
|                        | 11.6          | -22.6 | 77.4      | 2550            | -14.8 | 85.2      | 4240            | -5.9  | 94.1      |
|                        | 9.39          | -37.4 | 62.6      | 2680            | -10.6 | 89.4      | 3790            | -15.8 | 84.2      |
|                        | 8.76          | -41.6 | 58.4      | 2550            | -15   | 85        | 3990            | -11.4 | 88.6      |

ASA

|                        |               |       |           |                 |       |           |                 |       |           |
|------------------------|---------------|-------|-----------|-----------------|-------|-----------|-----------------|-------|-----------|
| Long 60 day            | LQC (15ng/ml) |       |           | MQC (3000ng/ml) |       |           | HQC (4500ng/ml) |       |           |
|                        | Conc.         | Bias% | Accuracy% | Conc.           | Bias% | Accuracy% | Conc.           | Bias% | Accuracy% |
|                        | 14.6          | -3    | 97        | 3130            | 4     | 104       | 4450            | -1.2  | 98.8      |
|                        | 14.4          | -4.3  | 95.7      | 3100            | 3     | 103       | 4240            | -5.8  | 94.2      |
|                        | 13.9          | -7.3  | 92.7      | 3100            | 3     | 103       | 4120            | -8.4  | 91.6      |
|                        | 14.8          | -1.6  | 98.4      | 3080            | 3     | 103       | 4220            | -6.2  | 93.8      |
|                        | 13.5          | -10.3 | 89.7      | 3150            | 5     | 105       | 4220            | -6.3  | 93.7      |
|                        | 13.6          | -9.4  | 90.6      | 3140            | 5     | 105       | 4200            | -6.7  | 93.3      |
| Short 4h (acidified)   | LQC (15ng/ml) |       |           | MQC (3000ng/ml) |       |           | HQC (4500ng/ml) |       |           |
|                        | Conc.         | Bias% | Accuracy% | Conc.           | Bias% | Accuracy% | Conc.           | Bias% | Accuracy% |
|                        | 16.8          | 12    | 112       | 3310            | 10    | 110       | 4560            | 1     | 101       |
|                        | 16            | 7     | 107       | 3280            | 9     | 109       | 4440            | -1.4  | 98.6      |
|                        | 16.1          | 7     | 107       | 3180            | 6     | 106       | 4330            | -3.7  | 96.3      |
|                        | 15.5          | 3     | 103       | 3390            | 13    | 113       | 4780            | 6     | 106       |
|                        | 16.2          | 8     | 108       | 3120            | 4     | 104       | 4530            | 1     | 101       |
|                        | 14.9          | -0.8  | 99.2      | 3280            | 9     | 109       | 4180            | -7.1  | 92.9      |
| 24h in autosampler     | LQC (15ng/ml) |       |           | MQC (3000ng/ml) |       |           | HQC (4500ng/ml) |       |           |
|                        | Conc.         | Bias% | Accuracy% | Conc.           | Bias% | Accuracy% | Conc.           | Bias% | Accuracy% |
|                        | 17.3          | 15    | 115       | 3460            | 15    | 115       | 4990            | 11    | 111       |
|                        | 17.1          | 14    | 114       | 3300            | 10    | 110       | 4800            | 7     | 107       |
|                        | 16.7          | 11    | 111       | 3310            | 10    | 110       | 4450            | -1.1  | 98.9      |
| Short 4h (unacidified) | LQC (15ng/ml) |       |           | MQC (3000ng/ml) |       |           | HQC (4500ng/ml) |       |           |
|                        | Conc.         | Bias% | Accuracy% | Conc.           | Bias% | Accuracy% | Conc.           | Bias% | Accuracy% |
|                        | 7.74          | -48.4 | 51.6      | 1620            | -45.9 | 54.1      | 2760            | -38.6 | 61.4      |
|                        | 7.82          | -47.9 | 52.1      | 1730            | -42.4 | 57.6      | 2590            | -42.5 | 57.5      |
|                        | 9.01          | -39.9 | 60.1      | 1750            | -41.5 | 58.5      | 2640            | -41.3 | 58.7      |
|                        | 8.92          | -40.5 | 59.5      | 1770            | -41.1 | 58.9      | 3100            | -31.1 | 68.9      |
|                        | 8.43          | -43.8 | 56.2      | 1830            | -39   | 61        | 2730            | -39.3 | 60.7      |
|                        | 8.9           | -40.7 | 59.3      | 1870            | -37.6 | 62.4      | 2780            | -38.3 | 61.7      |

SA

|                        |               |       |           |                 |       |           |                 |       |           |
|------------------------|---------------|-------|-----------|-----------------|-------|-----------|-----------------|-------|-----------|
| Long 60 day            | LQC (15ng/ml) |       |           | MQC (3000ng/ml) |       |           | HQC (4500ng/ml) |       |           |
|                        | Conc.         | Bias% | Accuracy% | Conc.           | Bias% | Accuracy% | Conc.           | Bias% | Accuracy% |
|                        | 16.4          | 9     | 109       | 3260            | 9     | 109       | 4470            | -0.7  | 99.3      |
|                        | 13.1          | -12.7 | 87.3      | 3070            | 2     | 102       | 4620            | 3     | 103       |
|                        | 15.5          | 4     | 104       | 3030            | 1     | 101       | 4560            | 1     | 101       |
|                        | 14.4          | -4    | 96        | 3110            | 4     | 104       | 4510            | 0     | 100       |
|                        | 15.2          | 1     | 101       | 3210            | 7     | 107       | 4840            | 7     | 107       |
| 14.2                   | -5.3          | 94.7  | 3150      | 5               | 105   | 4810      | 7               | 107   |           |
| Short 4h (acidified)   | LQC (15ng/ml) |       |           | MQC (3000ng/ml) |       |           | HQC (4500ng/ml) |       |           |
|                        | Conc.         | Bias% | Accuracy% | Conc.           | Bias% | Accuracy% | Conc.           | Bias% | Accuracy% |
|                        | 15.7          | 4     | 104       | 2860            | -4.8  | 95.2      | 4170            | -7.3  | 92.7      |
|                        | 16            | 7     | 107       | 2900            | -3.3  | 96.7      | 4270            | -5    | 95        |
|                        | 17.1          | 14    | 114       | 2860            | -4.8  | 95.2      | 4310            | -4.2  | 95.8      |
|                        | 16.6          | 11    | 111       | 2880            | -3.9  | 96.1      | 4260            | -5.2  | 94.8      |
|                        | 14.6          | -2.7  | 97.3      | 2890            | -3.7  | 96.3      | 4450            | -1.1  | 98.9      |
| 16.6                   | 10            | 110   | 2960      | -1.2            | 98.8  | 4300      | -4.5            | 95.5  |           |
| 24h in autosampler     | LQC (15ng/ml) |       |           | MQC (3000ng/ml) |       |           | HQC (4500ng/ml) |       |           |
|                        | Conc.         | Bias% | Accuracy% | Conc.           | Bias% | Accuracy% | Conc.           | Bias% | Accuracy% |
|                        | 16            | 7     | 107       | 2730            | -9.1  | 90.9      | 4130            | -8.3  | 91.7      |
|                        | 14.5          | -3.1  | 96.9      | 2820            | -6    | 94        | 4450            | -1.1  | 98.9      |
| 17.1                   | 14            | 114   | 2840      | -5.5            | 94.5  | 4120      | -8.5            | 91.5  |           |
| Short 4h (unacidified) | LQC (15ng/ml) |       |           | MQC (3000ng/ml) |       |           | HQC (4500ng/ml) |       |           |
|                        | Conc.         | Bias% | Accuracy% | Conc.           | Bias% | Accuracy% | Conc.           | Bias% | Accuracy% |
|                        | 18.2          | 21    | 121       | 3670            | 22    | 122       | 5850            | 30    | 130       |
|                        | 18.2          | 22    | 122       | 3880            | 29    | 129       | 5900            | 31    | 131       |
|                        | 19.2          | 28    | 128       | 3810            | 27    | 127       | 6030            | 34    | 134       |
|                        | 18.3          | 22    | 122       | 3740            | 25    | 125       | 5530            | 23    | 123       |
|                        | 18.2          | 21    | 121       | 3800            | 27    | 127       | 5530            | 23    | 123       |
| 17.5                   | 17            | 117   | 3700      | 23              | 123   | 5590      | 24              | 124   |           |
